# Supplementary material for: Cryo-solvatochromism in ionic liquids
Source: Royal Society of Chemistry journal article supplement (doi:10.1039/c4ra08116a), 2014-01-01
Supplement: c4ra08116a1.pdf [file c4ra08116a1.pdf]

# Cryo-solvatochromism in Ionic Liquids

Linpo Yu and George Z. Chen\*

Department of Chemical and Environmental Engineering, and Energy and Sustainability Research Division, Faculty of Engineering, University of Nottingham, Nottingham, NG7 2RD UK.

Fax: +44-115-9514115; Tel: +44-115-9514171; E-mail: george.chen@nottingham.ac.uk

## Electronic Support Information

### 1. Molecular structures

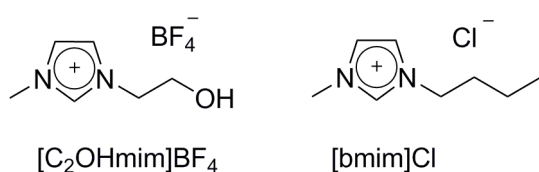

**Scheme S1** Molecular structures of (left) the ionic liquid,  $[\text{C}_2\text{OHmim}]\text{BF}_4$ , as the donor solvent, and (right) the  $\text{Cl}^-$  source compound,  $[\text{bmim}]\text{Cl}$ .

### 2. General thermo-solvatochromic reaction

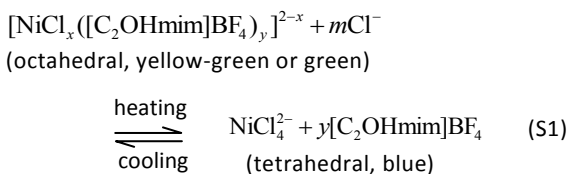

where  $0 \leq x \leq 4$ ,  $2 \leq y \leq 6$ ,  $x + y = 6$ , and  $m + x = 4$ . These restrictions lead to a maximum of four octahedral complex ions. Charge balancing ions (CBIs:  $\text{BF}_4^-$ ,  $[\text{bmin}]^+$  and/or  $[\text{C}_2\text{OHmim}]^+$ ) are not shown in Reaction (S1). The type and number of CBIs in (S1) depend on the value of  $x$ ,  $y$  and  $m$ . In Reaction (1),  $x = y = 3$ ,  $m = 1$ , and the CBI is  $[\text{bmin}]^+$ .

### 3. Enthalpy changes derived from DSC curves 3 to 5 in Fig. 2C and 2D (Table S1)

| Solutions (in $[\text{C}_2\text{OHmim}]\text{BF}_4$ )                                                        | $\Delta H$ ( $\text{J g}^{-1}$ )<br>Cooling | $\Delta H$ ( $\text{J g}^{-1}$ )<br>Heating | $\Delta H^*$ ( $\text{kJ mol}^{-1}$ )<br>Cooling | $\Delta H^*$ ( $\text{kJ mol}^{-1}$ )<br>Heating |
|--------------------------------------------------------------------------------------------------------------|---------------------------------------------|---------------------------------------------|--------------------------------------------------|--------------------------------------------------|
| $0.14 \text{ mol L}^{-1} [\text{bmim}]_2\text{NiCl}_4$                                                       | 2.01                                        | 2.02                                        | 59.1                                             | 59.4                                             |
| $0.14 \text{ mol L}^{-1} [\text{bmim}]_2\text{NiCl}_4$<br>+ $0.28 \text{ mol L}^{-1} [\text{bmim}]\text{Cl}$ | 3.98                                        | 4.06                                        | 59.1                                             | 59.3                                             |
| $0.14 \text{ mol L}^{-1} [\text{bmim}]_2\text{NiCl}_4$<br>+ $0.70 \text{ mol L}^{-1} [\text{bmim}]\text{Cl}$ | 3.42                                        | 3.81                                        | 59.0                                             | 59.3                                             |

\* Estimated using density of  $[\text{C}_2\text{OHmim}]\text{BF}_4$  ( $1.37 \text{ g mL}^{-1}$ ).

### 4. Cryochromic film and ionic liquid

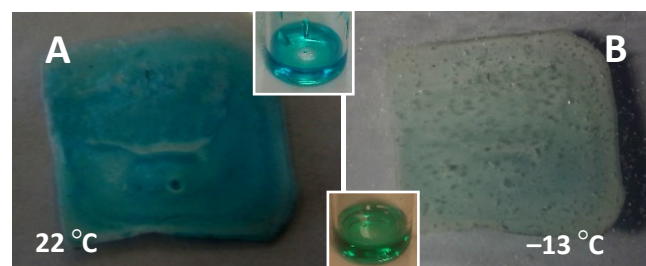

**Fig. S1** Photographs of a composite film ( $2 \text{ cm} \times 2 \text{ cm}$ ) of  $[\text{C}_2\text{OHmim}]\text{BF}_4$ - $[\text{C}_2\text{OHmim}]\text{Cl}$ - $[\text{bmim}]_2\text{NiCl}_4$ -PVDF (mass ratio: 5:7:1:10) at (A)  $22 \text{ }^\circ\text{C}$ , (B)  $-13 \text{ }^\circ\text{C}$  (in freezer). The insets show the ionic liquid solution at the respective temperatures. Note that the tiny spots in (B) were ice dusts.

### 5. Colours at different temperatures

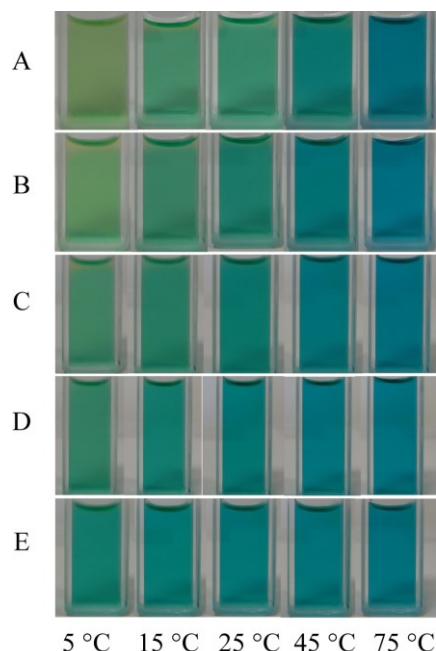

**Fig. S2** Photographs of  $0.0207 \text{ mol L}^{-1} [\text{bmim}]_2\text{NiCl}_4$  in  $[\text{C}_2\text{OHmim}]\text{BF}_4$  in the absence (row A) and presence (rows B to E) of  $[\text{bmim}]\text{Cl}$  at indicated temperatures and the following concentrations: (A) without  $[\text{bmim}]\text{Cl}$ ; (B) 0.04, (C) 0.10, (D) 0.20, and (E)  $0.40 \text{ mol L}^{-1} [\text{bmim}]\text{Cl}$ .
